# Supplementary material for: Regenerative Urban Design across Academia and Practice: Mixed- Method Analysis of Conceptual Alignment and Implementation Barriers
Source: Research Square preprint supplement (doi:10.21203/rs.3.rs-8186820/v1), 2025-12-10
Supplement: Supplementary file 2 [file 986ba63906a57a05f794bd03.docx]

# APPENDIX C

**Survey Instrument and Quantitative Results**

## C.1 Survey Overview

This appendix presents the complete survey instrument and quantitative results from the firm-wide practitioner survey conducted at Henning Larsen Architects, a Copenhagen-headquartered international firm, working across architecture, urban design and landscape. The survey was distributed to all 590 employees across 15 offices globally, with 113 responses received (19.2% response rate). Data collection occurred between January and February 2025 over a four-week period with two reminder emails.

The survey comprised four sections: (1) demographic and professional background, (2) awareness and experience with regenerative design, (3) conceptual understanding assessed through 14 Likert-scale statements, and (4) open-ended questions exploring understanding, implementation barriers, and evaluation approaches. No definitions were provided in advance to capture existing practitioner knowledge without priming.

The collected original responses can be requested and accessed via the online repository at https://doi.org/10.5281/zenodo.17682966

## C.2 Respondent Characteristics

Table A1 presents the demographic distribution of survey respondents by office location, primary discipline, and years of professional experience (n=113).

*Table A1. Respondent demographic characteristics (n=113)*

| **Category** | **n (%)** |
| --- | --- |
| **Office Location** |  |
| Denmark (Copenhagen + Aarhus) | 50 (44.2%) |
| Norway (Oslo + Bergen + Trondheim) | 30 (26.5%) |
| Germany (Munich + Berlin + Hamburg + Überlingen) | 16 (14.2%) |
| United States (New York) | 7 (6.2%) |
| Singapore | 6 (5.3%) |
| Other (Stockholm, Sydney, Faroe Islands) | 4 (3.5%) |
| **Primary Discipline** |  |
| Architecture | 46 (40.7%) |
| Landscape Architecture | 26 (23.0%) |
| Urban Design/Planning | 16 (14.2%) |
| Research/Innovation/Sustainability | 8 (7.1%) |
| Other (Interiors, Communication, Management) | 17 (15.0%) |
| **Years of Experience** |  |
| 0-2 years | 10 (8.8%) |
| 2-5 years | 23 (20.4%) |
| 5-10 years | 23 (20.4%) |
| 10-15 years | 20 (17.7%) |
| 15+ years | 37 (32.7%) |

## C.3 Awareness and Experience with Regenerative Design

Table A2 presents responses to questions assessing awareness of and experience with regenerative design concepts.

*Table A2. Awareness and experience with regenerative design (n=113)*

| **Question** | **Response** |
| --- | --- |
| **Have you heard about or encountered the Regenerative Paradigm in Urban Design?** |  |
| Yes | 66 (58.4%) |
| No | 40 (35.4%) |
| Unsure | 7 (6.2%) |
| **Have you come across the term 'Regenerative' in project briefs or competitions?** |  |
| Yes | 30 (26.5%) |
| No | 83 (73.5%) |
| **Have you worked on projects described as Regenerative?** |  |
| Yes | 14 (12.4%) |
| Unsure | 17 (15.0%) |
| No | 82 (72.6%) |

## C.4 Conceptual Understanding: Likert Scale Responses

Table A3 presents the distribution of responses to 14 Likert-scale statements assessing conceptual understanding of regenerative design principles (n=113). Scale: 1 = Strongly Disagree, 2 = Disagree, 3 = Neutral, 4 = Agree, 5 = Strongly Agree. Abbreviations: SD = Strongly Disagree, D = Disagree, N = Neutral, A = Agree, SA = Strongly Agree.

*Table A3. Likert scale responses on regenerative design principles (n=113)*

| **Statement** | **Mean (Standard Deviation)** | **SD n (%)** | **D n (%)** | **N n (%)** | **A n (%)** | **SA n (%)** |
| --- | --- | --- | --- | --- | --- | --- |
| Regenerative design brings fundamentally new principles beyond sustainability | 3.78 (0.81) | 1 (0.9%) | 7 (6.2%) | 25 (22.1%) | 63 (55.8%) | 17 (15.0%) |
| A project can only be considered Regenerative if it creates more resources than it consumes | 3.43 (1.03) | 3 (2.7%) | 22 (19.5%) | 25 (22.1%) | 49 (43.4%) | 14 (12.4%) |
| The success of a Regenerative project can be measured through quantifiable metrics | 3.58 (0.84) | 2 (1.8%) | 9 (8.0%) | 35 (31.0%) | 56 (49.6%) | 11 (9.7%) |
| The impact of a Regenerative project can only be assessed over a long period (10+ years) | 3.37 (1.03) | 0 (0.0%) | 26 (23.0%) | 39 (34.5%) | 28 (24.8%) | 20 (17.7%) |
| Regenerative projects require fundamentally different expertise than sustainable projects | 3.06 (0.93) | 2 (1.8%) | 30 (26.5%) | 49 (43.4%) | 23 (20.4%) | 9 (8.0%) |
| A project cannot be regenerative if it prioritizes human needs over ecological systems | 3.16 (1.13) | 7 (6.2%) | 28 (24.8%) | 33 (29.2%) | 30 (26.5%) | 15 (13.3%) |
| The regenerative potential of a site can be accurately predicted through proper site analysis | 3.53 (0.78) | 1 (0.9%) | 9 (8.0%) | 40 (35.4%) | 55 (48.7%) | 8 (7.1%) |
| Site analysis is the most crucial phase for achieving Regenerative outcomes | 3.36 (0.88) | 1 (0.9%) | 18 (15.9%) | 42 (37.2%) | 43 (38.1%) | 9 (8.0%) |
| Traditional site analysis tools are inadequate for understanding Regenerative potential | 3.52 (0.84) | 0 (0.0%) | 12 (10.6%) | 43 (38.1%) | 45 (39.8%) | 13 (11.5%) |
| Site analysis must extend beyond the project boundary to understand Regenerative potential | 4.25 (0.74) | 0 (0.0%) | 2 (1.8%) | 14 (12.4%) | 51 (45.1%) | 46 (40.7%) |
| A truly Regenerative urban design must always incorporate natural elements and vegetation | 3.65 (1.08) | 3 (2.7%) | 15 (13.3%) | 29 (25.7%) | 37 (32.7%) | 29 (25.7%) |
| Regenerative projects can only be implemented on sites that have been previously developed | 2.54 (0.98) | 12 (10.6%) | 51 (45.1%) | 32 (28.3%) | 13 (11.5%) | 5 (4.4%) |
| The regenerative potential of a site can be fully understood through current analysis methods | 2.68 (0.80) | 3 (2.7%) | 48 (42.5%) | 47 (41.6%) | 12 (10.6%) | 3 (2.7%) |
| Site analysis for Regenerative projects requires fundamentally different tools than conventional projects | 3.44 (0.78) | 0 (0.0%) | 11 (9.7%) | 50 (44.2%) | 43 (38.1%) | 9 (8.0%) |

## C.5 Complete Survey Instrument

This section presents the complete survey instrument with all questions organized by section.

### Section 1: Professional Background

1. What is your main field of work at Henning Larsen?
2. What is your educational background?
3. How many years of experience do you have in your field?
4. Which Henning Larsen office are you mainly located in?

### Section 2: Awareness and Experience

1. Have you heard about or encountered the Regenerative Paradigm in Urban Design (before today)?
2. Have you come across the term 'Regenerative' in a project brief, description, or competition?
3. *If yes to question 6, which projects? (excluded from paper for confidentiality)*
4. Have you worked on projects that were described as Regenerative by your team or project leader?
5. *If yes to question 8, which projects? (excluded from paper for confidentiality)*

### Section 3: Conceptual Understanding (5-point Likert Scale)

*Please indicate your level of agreement with the following statements (Strongly Disagree, Disagree, Neutral, Agree, Strongly Agree):*

1. Regenerative design brings fundamentally new principles beyond sustainability
2. A project can only be considered Regenerative if it creates more resources than it consumes
3. The success of a Regenerative project can be measured through quantifiable metrics
4. The impact of a Regenerative project can only be assessed over a long period of time (10+ years)
5. Regenerative projects require fundamentally different expertise than sustainable projects
6. A project cannot be regenerative if it prioritizes human needs over ecological systems
7. The regenerative potential of a site can be accurately predicted through a proper site analysis
8. Site analysis is the most crucial phase for achieving Regenerative outcomes
9. Traditional site analysis tools are inadequate for understanding Regenerative potential
10. Site analysis must extend beyond the project boundary to understand Regenerative potential
11. A truly Regenerative urban design must always incorporate natural elements and vegetation, and blur the line between city and nature
12. Regenerative projects can only be implemented on sites that have been previously developed
13. The regenerative potential of a site can be fully understood through current analysis methods
14. Site analysis for Regenerative projects requires fundamentally different tools and approaches than conventional projects

### Section 4: Open-Ended Questions

*The following open-ended questions were included in the study to capture nuanced practitioner perspectives. Response rates varied from 26.5% to 40.7% of respondents.*

1. What is, in your understanding, Regenerative Urban Design? (Response rate: 40.7%)
2. What are the key things we could or should learn about a site when we perform Site Analysis? (Response rate: 40.7%)
3. What aspects of site analysis should architects and urban designers approach differently when working on a regenerative project compared to a conventional one? (Response rate: 37.2%)
4. What types of knowledge, tools, or data do you consider essential for understanding a site's regenerative potential? Please explain why. (Response rate: 26.5%)
5. What do you see as the key barriers to implementing thorough site analysis for regenerative projects in current practice? (Response rate: 38.1%)
6. How do you think we should measure or evaluate whether a project has achieved regenerative outcomes? Please provide specific examples if possible. (Response rate: 32.7%)
7. What aspects of site analysis do you think are currently overlooked but crucial for regenerative design? (Response rate: 26.5%)

_______________

*Note: The complete anonymized response data is available from the corresponding author upon reasonable request at https://doi.org/10.5281/zenodo.17682966*
