# Supplementary material for: Regenerative Urban Design across Academia and Practice: Mixed- Method Analysis of Conceptual Alignment and Implementation Barriers
Source: Research Square preprint supplement (doi:10.21203/rs.3.rs-8186820/v1), 2025-12-10
Supplement: Supplementary file 3 [file 9e0203ee00a2f99331f77269.docx]

# APPENDIX E

**Semi-Structured Interviews Protocol**

## E.1 Interview Protocol Overview

Semi-structured interviews were conducted with seven experts in Denmark between January and June 2025. Each interview lasted 60-90 minutes and was audio-recorded with informed consent. The protocol followed a flexible thematic structure organized around five core themes, allowing for organic conversation while ensuring consistent coverage of key topics across all participants.

Interviews were conducted in person at participants' preferred locations, and have all taken place in person. The semi-structured format enabled follow-up questions and deeper exploration of participant responses while maintaining comparability across interviews. All participants received the consent form and research information sheet in advance.

## E.2 Interview Structure and Duration

### Section 1: Opening (5-10 minutes)

1. Introduction to researcher and research project
2. Explanation of interview format and expected duration
3. Consent procedures and recording permissions
4. Warm-up questions about participant's background and experience with regenerative design

### Section 2: Core Thematic Questions (45-70 minutes)

***Theme 1: Understanding Regenerative Urban Design***

1. How would you define regenerative design in the context of urban projects?
2. What do you see as the key principles that distinguish regenerative design from other related approaches, like sustainability or green development?
3. What elements are essential for achieving regeneration in urban projects?
4. What outcomes would indicate a successful regenerative project?
5. How has your understanding of regenerative design evolved through your work?

***Theme 2: Implementation and Site Analysis***

1. How could or should a regenerative approach influence site analysis?

*Follow-up: How is this impacting your practice or research?*

1. Could you give an example of a project where regenerative principles significantly influenced your site analysis approach?
2. What parameters would indicate a successful regenerative project?

***Theme 3: Implementation Challenges***

1. How do you translate regenerative principles into practice?
2. What do you see as the main challenges in implementing regenerative principles?
3. How do you balance regenerative aspirations with practical constraints?

***Theme 4: Industry Evolution***

1. How do you see the relationship between regenerative theory and practice evolving?
2. What changes would help bridge the gap between regenerative theory and practical implementation?
3. How do different stakeholders influence regenerative implementation?

***Theme 5: AI Implementation (Optional)***

1. What could be the potential of AI for Regenerative Urban Design? What could be the dangers?

### Section 3: Follow-up Prompts (Used Throughout)

The following prompts were used flexibly throughout interviews to encourage elaboration and concrete examples:

1. Could you elaborate on that point?
2. Can you give a specific example?
3. What led you to that conclusion?
4. How does that work in practice?
5. Could you describe what that looks like?

## E.3 Data Collection Procedures

**All interviews were:**

1. Conducted in person at locations convenient for participants
2. Audio-recorded with explicit informed consent
3. Transcribed verbatim for analysis
4. Anonymized using participant codes (A1-A3 for academics, P1-P4 for practitioners)
5. Stored securely in accordance with GDPR requirements

Participants were given the opportunity to review transcripts and approve any direct quotes used in publications. All participants provided written consent using the standardized consent form included in this appendix.

_______________

*Note: The complete consent form used for this research is available from the corresponding author upon request. Full interview transcripts have been anonymized and are stored securely in accordance with ethical approval requirements.*
