# Supplementary material for: Regenerative Urban Design across Academia and Practice: Mixed- Method Analysis of Conceptual Alignment and Implementation Barriers
Source: Research Square preprint supplement (doi:10.21203/rs.3.rs-8186820/v1), 2025-12-10
Supplement: Supplementary file 4 [file abaa2d240e38da2bf3a3a5d3.docx]

# APPENDIX A

**Systematic Literature Review Methodology**

## A.1 Protocol and Registration

This systematic review followed PRISMA 2020 reporting guidance for database searches. No protocol was prospectively registered. The completed PRISMA 2020 checklist and flow diagram are provided in this appendix.

## A.2 Information Sources and Coverage

Databases: Web of Science (Core Collection) and Scopus

Coverage: Peer-reviewed journal literature published between 2007-2024

Search strategies are provided verbatim in Section A.3.

## A.3 Full Search Strategies (Verbatim)

### Web of Science (Topic Search), 2007-2024

( TS=( ( "regenerative design*" OR "regenerative develop*" OR "regenerative architecture" OR "regenerative planning" OR "regenerative urban*" OR "regenerative built environment" OR "regenerative building*" OR "regenerative neighborhood*" OR "regenerative paradigm" OR "regenerative place*" OR "regenerative construction" OR "regenerative sustainability" ) AND ( implement* OR practice* OR "site analysis" OR method* OR framework* OR approach* OR theory OR paradigm OR principle* OR process* OR strategy OR strategies ) ) OR TS=( regenerative NEAR/2 ( design* OR develop* OR urban* OR architect* OR plan* OR build* OR environment* OR construction OR neighborhood* OR district* OR city OR cities OR infrastructure ) ) ) AND TS=(architect* OR urban* OR development* OR city* OR planning OR "built environment") NOT TS=(cell* OR tissue* OR medical OR medicine OR biology OR biological OR neural OR bone OR muscle OR organ OR stem OR wound*) AND PY=(2007-2024)

### Scopus (TITLE-ABS-KEY), 2007-2024

(PUBYEAR > 2006 AND PUBYEAR < 2025) AND TITLE-ABS-KEY( ( ( "regenerative design*" OR "regenerative develop*" OR "regenerative architecture" OR "regenerative planning" OR "regenerative urban*" OR "regenerative built environment" OR "regenerative building*" OR "regenerative neighborhood*" OR "regenerative paradigm" OR "regenerative place*" OR "regenerative construction" OR "regenerative sustainability" ) AND ( implement* OR practice* OR "site analysis" OR method* OR framework* OR approach* OR theory OR paradigm OR principle* OR process* OR strategy OR strategies ) ) OR ( regenerative W/2 ( design* OR develop* OR urban* OR architect* OR plan* OR build* OR environment* OR construction OR neighborhood* OR district* OR city OR cities OR infrastructure ) ) ) AND TITLE-ABS-KEY(architect* OR urban* OR development* OR city* OR planning OR "built environment") AND NOT TITLE-ABS-KEY(cell* OR tissue* OR medical OR medicine OR biology OR biological OR neural OR bone OR muscle OR organ OR stem OR wound*)

## A.4 Eligibility Criteria

### Inclusion Criteria

• Explicit treatment of regenerative design/development/urbanism with conceptual and/or operational relevance.

• Publication years 2007-2024 and English language.

• Peer-reviewed journal publications (research articles, reviews, case reports, or synthesis) addressing regenerative approaches in the built environment, architecture, planning, or urban contexts.

### Exclusion Criteria

• Biomedical/clinical uses of "regeneration" (e.g., cell, tissue, wound, organ, bone, muscle, neural).

• Non-built environment or non-urban contexts.

• Editorials, introductory chapters, commentaries, forums, books or book chapters, conference proceedings, information or concept papers, and grey literature.

## A.5 Selection Process and Flow

The systematic review followed a multi-stage screening process as illustrated in the PRISMA 2020 flow diagram below (Figure A1). Initial database searches yielded 1,845 records (712 from Web of Science, 1,133 from Scopus). After removing 568 duplicates, 1,277 unique records underwent title and abstract screening against predetermined inclusion and exclusion criteria. Following this screening, 111 articles proceeded to full-text assessment for eligibility, with particular attention to article type and comparable peer review quality. The final corpus comprised 68 peer-reviewed journal articles that met all inclusion criteria and formed the basis for thematic literature analysis.

***Figure A1. PRISMA 2020 Flow Diagram – following official format***

**Identification of studies via databases and registers**

Records removed *before screening*:

Duplicate records removed (n = 568)

Records identified from:

Databases (n = 1,845):

WoS = 712

Scopus = 1,133

**Identification**

Records screened

(n = 1,277)

Records excluded

(n = 1,166)

Reports sought for retrieval

(n = 111)

Reports not retrieved

(n = 0)

**Screening**

Reports excluded (n = 43):

Reasons for exclusion:

- Not peer-reviewed
- Article type:
  editorial, introductory chapter, commentary, forum, conference proceeding, information paper, book
- No urban focus

Reports assessed for eligibility

(n = 111)

Studies included in review

(n = 68)

**Included**

***Figure A2. PRISMA 2020 Flow Diagram – Simplified***

| **Stage** | **Count** |
| --- | --- |
| Records identified: Web of Science | 712 |
| Records identified: Scopus | 1,133 |
| Duplicates removed | 568 |
| Records screened (title/abstract) | 1,277 |
| Full-text articles assessed for eligibility | 111 |
| **Studies included in synthesis** | **68** |

*Note: Title and abstract screening followed predetermined inclusion/exclusion criteria. Full texts were assessed for eligibility with focus on article type and peer-review rigor. Unclear cases were resolved through discussion and consensus among the authors.*

## A.6 Data Collection and Availability

### Data Items Extracted

For each included study, the following data items were systematically extracted:

**Bibliographic data:** Author(s), publication title, year of publication, keywords, journal, journal type, journal discipline, publisher, affiliation of lead author, country location of lead author´s affiliation, and funding type.

**Conceptual data:** Definition provided for regenerative urban design, and cited origin for definition, core principles/strategies, implementation challenges/barriers, resolutions in form of benchmarks/references, metrics/indicators, and role of ecosystems/ ecosystem services.

The complete dataset with extracted data for all 68 included publications used for analysis is available at https://doi.org/10.5281/zenodo.17682966

_______________

*Note: A complete reference list of all included studies is provided in Appendix B.*
