# Supplementary material for: Regenerative Urban Design across Academia and Practice: Mixed- Method Analysis of Conceptual Alignment and Implementation Barriers
Source: Research Square preprint supplement (doi:10.21203/rs.3.rs-8186820/v1), 2025-12-10
Supplement: Supplementary file 5 [file abdd99b995bdf1092c08e89f.docx]

# APPENDIX D

**Interview Participants Profiles**

## D.1 Participant Selection and Sampling

Seven expert interviews were conducted in person between January and June 2025. Participants were selected using purposive sampling to deepen insights across academic research and design and planning practice contexts. Selection criteria included: (1) minimum ten years of professional experience, (2) demonstrated engagement with regenerative design or advanced sustainability approaches, and (3) active involvement in urban design, architecture, or urban policy. The sample comprised three academics (A1-A3), three practitioners from leading architectural firms (P1, P2, P4), and one policy professional (P3).

## D.2 Participant Profiles

Table D1 presents the professional profiles of interview participants at the time of interview, including anonymized identifiers used throughout the manuscript, roles, institutional affiliations, and areas of expertise relevant to regenerative urban design.

*Table D1. Interview participant profiles (n=7)*

| **Identifier** | **Role** | **Affiliation** | **Expertise / Relevance** |
| --- | --- | --- | --- |
| **A1** | Distinguished Professor | The Royal Danish Academy, University of Sevilla, Norman Foster Institute, UNSW Sydney | Academic expert on regenerative urban design, sustainable architecture, and computational methods |
| **A2** | PhD in Architecture (Regenerative Transformation and Biodiversity) | Independent researcher and developer in regenerative and biodiversity projects | Academic expert on regenerative transformation in urban and rural contexts |
| **A3** | Professor and Head of Department | Aarhus University, co-founder of Aarhus Center for Regenerative Building | Academic with civil engineering background and expertise in regenerative building and interdisciplinary collaboration |
| **P1** | Head of Innovation | Schmidt Hammer Lassen Architects, Living Future Associate (ILFI) | Practitioner and researcher at intersection of regenerative architecture, ILFI frameworks, and innovation |
| **P2** | Lead Sustainability Architect | Henning Larsen | Practitioner engaged in LCA, sustainability strategy, and critical view on regenerative terminology |
| **P3** | Program Director for Resilient and Sustainable City Solutions | City of Copenhagen, also affiliated with C40 Cities | Municipal leader with expertise in climate adaptation, resilience, and urban transformation |
| **P4** | Architect and Sustainability Lead | COBE Architects | Practitioner applying regenerative principles in urbanism and architectural projects across scales |

**Note on Anonymization:**

Participant identifiers are used throughout the manuscript to protect confidentiality while maintaining traceability between quotes and speaker type. Codes beginning with 'A' denote academic experts, while codes beginning with 'P' denote practitioners or policy professionals.

_______________

*Note: While all participants have signed consent to have their names appear in the paper, full interview transcripts have been anonymized and are stored securely in accordance with GDPR requirements and institutional ethical approval.*
